# Supplementary material for: Construction of a high density linkage map and genome dissection of bruchid resistance in zombi pea (Vigna vexillata (L.) A. Rich)
Source: PubMed Central journal article supplement (PMC6690978; doi:10.1038/s41598-019-48239-5), 2019-08-12
Supplement: 41598_2019_48239_MOESM1_ESM.pdf [file 41598_2019_48239_MOESM1_ESM.pdf]

## Supplementary Information

### **Construction of a high density linkage map and genome dissection of bruchid resistance in zombi pea (*Vigna vexillata* (L.) A. Rich)**

Kitiya Amkul<sup>1,2,3</sup>, Lixia Wang<sup>4\*</sup>, Prakrit Somta<sup>1,2,3\*</sup>, Suhua Wang<sup>4</sup>, Xuzhen Cheng<sup>4</sup>

<sup>1</sup>Department of Agronomy, Faculty of Agriculture at Kamphaeng Saen, Kasetsart University, Kamphaeng Saen Campus, Nakhon Pathom 73140, Thailand

<sup>2</sup>Center of Advanced Studies for Agriculture and Food, Kasetsart University Institute of Advanced Studies, Kasetsart University, Bangkok 10900, Thailand

<sup>3</sup>Center of Excellence on Agricultural Biotechnology: (AG-BIO/PERDO-CHE), Bangkok 10900, Thailand

<sup>4</sup>Institute of Crop Sciences, Chinese Academy of Agricultural Sciences, Beijing 100081, China

\* Correspondence: Dr. Prakrit Somta, Department of Agronomy, Faculty of Agriculture at Kamphaeng Saen, Kasetsart University, Kamphaeng Saen Campus, Nakhon Pathom 73140, Thailand. Email: agrpks@ku.ac.th, Dr. Lixia Wang, Institute of Crop Sciences, Chinese Academy of Agricultural Sciences, Beijing 100081, China. Email: wanglixia03@caas.cn

**Table S1** Genome synteny between genetic linkage map of *Vigna vexillata* (LG1 – LG11) and reference genome sequence of cowpea (*V. unguiculata*), mungbean (*V. radiata*), azuki bean (*V. angularis*), and common bean (*Phaseolus vulgaris*)

| LGs of zombi pea<br>( <i>V. vexillata</i> ) | Corresponding chromosomes of related legume species |                                   |                                       |                                       |
|---------------------------------------------|-----------------------------------------------------|-----------------------------------|---------------------------------------|---------------------------------------|
|                                             | Cowpea<br>( <i>V. unguiculata</i> )                 | Mungbean<br>( <i>V. radiata</i> ) | Azuki bean<br>( <i>V. angularis</i> ) | Common bean<br>( <i>P. vulgaris</i> ) |
| 1                                           | 1                                                   | 2, 3, 5                           | 4, 7                                  | 1, 5                                  |
| 2                                           | 2                                                   | 11                                | 10                                    | 2, 3                                  |
| 3                                           | 3                                                   | 7                                 | 1                                     | 2, 3                                  |
| 4                                           | 4                                                   | 1                                 | 11                                    | 4                                     |
| 5                                           | 5                                                   | 4, 5                              | 4, 7                                  | 5, 8                                  |
| 6                                           | 6                                                   | 10                                | 5                                     | 6                                     |
| 7                                           | 7                                                   | 8                                 | 8                                     | 7                                     |
| 8                                           | 8                                                   | 6                                 | 3                                     | 1, 8                                  |
| 9                                           | 9                                                   | 5                                 | 2                                     | 9                                     |
| 10                                          | 10                                                  | 9                                 | 9                                     | 10                                    |
| 11                                          | 11                                                  | 2                                 | 6                                     | 11                                    |

**Table S2.** Correlation between resistance-related traits caused by *C. chinensis* and *C. maculatus* in the F<sub>2</sub> population of the cross between cultivated zombi pea "TVNu 240" and wild zombi pea "TVNu 1623"

|                                                      | <b>% damaged seeds<br/>caused by <i>C. chinensis</i></b> | <b>AUDPS caused by <i>C.<br/>chinensis</i></b> | <b>% damage seeds caused by <i>C.<br/>maculatus</i></b> |
|------------------------------------------------------|----------------------------------------------------------|------------------------------------------------|---------------------------------------------------------|
| <b>AUDPS caused by <i>C. chinensis</i></b>           | 0.9990***                                                |                                                |                                                         |
| <b>% damaged seeds caused by <i>C. maculatus</i></b> | 0.7174***                                                | 0.6970***                                      |                                                         |
| <b>ADUPS caused by <i>C. maculatus</i></b>           | 0.7217***                                                | 0.7044***                                      | 0.9968***                                               |

\*\*\*Significant at  $P < 0.001$
